# Supplementary material
Source: PubMed Central journal article supplement (PMC3126387)
Supplement: supp_77_9_3132__1.pdf [file supp_77_9_3132__1.pdf]

1 Supplemental Material

2

3 **Heavy metal tolerance of Fe(III)-reducing microbial communities in a contaminated**  
4 **creek bank soil**

5

6 Eva-Maria Burkhardt<sup>1</sup>, Sebastian Bischoff<sup>1†</sup>, Denise M. Akob<sup>1</sup>, Georg Büchel<sup>2</sup>, and Kirsten  
7 Küssel<sup>1\*</sup>

8

9 <sup>1</sup>Institute of Ecology, Friedrich Schiller University Jena, Dornburger-Straße 159, D-07743

10 Jena, Germany

11 <sup>2</sup>Institute of Earth Sciences, Friedrich Schiller University Jena, Burgweg 11, D-07749 Jena,

12 Germany

13 <sup>†</sup>Present address: Institute of Geography, Friedrich Schiller University Jena, Löbdergraben 32,

14 D-07743 Jena, Germany

15

16

17

18 \*corresponding author:

19 Institute of Ecology, Friedrich Schiller University Jena, Dornburger-Straße 159, D-07743

20 Jena, Germany

21 Phone: +49-3641-949461

22 Fax: +49-3641-949402

23 e-mail: [Kirsten.Kuesel@uni-jena.de](mailto:Kirsten.Kuesel@uni-jena.de)

24

25

## 1 **Geochemistry of the study site.**

2 In the pore water samples, Fe(II) was measured after HCl extraction with the phenanthroline  
3 method (13) as described previously (4, 10). Dissolved metals were measured in pore water  
4 samples acidified with nitric acid (65%, Roth, Karlsruhe, Germany) with ICP-MS  
5 (inductively coupled plasma – mass spectrometry; X-Series II, Quadrupol ICP-MS, Fa.  
6 Thermo Electron, Bremen). Each sample was measured 4 times. Fe(II) and metal  
7 concentrations are shown in Fig. S1.

## 8 **DNA extraction and clone library construction from metal amended cultures.** Culture

9 samples were centrifuged (13,780 x g, 15 min) and DNA was extracted from the pellets using  
10 the PowerSoil DNA Isolation Kit (MOBIO Laboratories Inc., Carlsbad, CA, USA) with the  
11 alternative lysis method as given by the manufacturer. For PCR amplification the general  
12 domain *Bacteria* SSU rRNA gene primers fD1 (5'-AGA GTT TGA TCC TGG CTC AG-3')  
13 and rP2 (5'-ACG GCT ACC TTG TTA CGA CTT-3', 14) were used with the FailSafe PCR  
14 PreMix D (EPICENTRE Biotechnologies, Madison, WI, USA) and high yield Taq  
15 polymerase (Jena Bioscience, Jena, Germany). PCR products were gel-purified (Agarose Gel  
16 Extraction Kit, Jena Bioscience, Jena, Germany). PCR products of all three DNA extracts  
17 were combined during gel-purification. The cleaned PCR products were used to construct a  
18 clone library using the pGEM-T Vector System and JM109 High Efficiency Competent Cells  
19 (Promega, Madison, USA) following the manufacturer's instructions. The cloned inserts were  
20 amplified using the vector specific primers M13F and M13R. Restriction fragment length  
21 polymorphism (RFLP) analysis was used to group the clones into phylotypes based on pattern  
22 similarity after cutting with the restriction enzymes *BshF1* and *MspI* (Fermentas, St. Leon-Rot,  
23 Germany). Representative clones from each phylotype were sequenced bidirectionally  
24 (AGOWA GmbH, Berlin, Germany).

25 Sequences were assembled using BioEdit version 7.0.5.3 (7). Prior to comparative  
26 phylogenetic analysis, vector and primer sequences flanking the SSU rRNA gene inserts were

1 removed. Previously identified sequences with high sequence similarity to the clones obtained  
2 in this study were determined using the BLAST algorithm against the GenBank database  
3 available from National Center for Biotechnology Information (NCBI) (1). Clone sequences  
4 were checked for chimeras using the program Chimera Check from the Ribosomal Database  
5 Project II (5), the Bellerophon server (8), and Pintail (2). Clone sequences were grouped  
6 further into phylotypes based on a sequence similarity cut off of 97% using FastGroupII (15;  
7 Table S1). Statistical analyses were used to determine the sampling efficiencies and coverage  
8 of the clone library (6, 11). Sequences generated in this study were deposited in the GenBank  
9 database under the accession numbers HM992482 to HM992491.

10 **Denaturing gradient gel electrophoresis (DGGE).** DNA from the same extracts as  
11 used for clone library construction was amplified using the general domain *Bacteria* SSU  
12 rRNA gene primers mentioned above with the FailSafe PCR PreMix C (EPICENTRE  
13 Biotechnologies, Madison, WI, USA). Amplification was performed with the following  
14 temperature program: 5 min at 95°C, 30 cycles of 1 min at 95°C, 1 min at 56°C, 1 min at  
15 72°C, and 10 min at 72°C. PCR products from this reaction were used for nested PCR in a  
16 similar temperature program as before with only 20 cycles and 54°C annealing temperature.  
17 For nested PCR the primers R1401 (5'-GCG TGT GTA CAA GAC CC-3') and F968GC (5'-  
18 GC clamp-AAC GCG AAG AAC CTT AC-3'; 9) and FailSafe PCR PreMix G (EPICENTRE  
19 Biotechnologies, Madison, WI, USA) were used. The nested PCR products were gel  
20 quantified using the software Gene Tools 4.0 (SynGene, Cambridge, UK) and 500 ng nested  
21 PCR product were loaded on the DGGE gel. Gradient gels contained 8% acrylamide and the  
22 gradient ranged from 50% to 65%. DGGE was run at 60°C and 100 V for 15 hours in 0.5 x  
23 TAE buffer (20 mM Tris, 0.5 mM EDTA, pH 8). Gels were stained with SybrGold  
24 (Invitrogen, Carlsbad, CA USA) for documentation.

25 Selected bands were cut from the gradient gels, incubated in 50µl TE-buffer for 4 h at  
26 room temperature, and stored at -20°C. Samples were reamplified with nested PCR as

1 described above, using the DNA-containing TE-buffer as template, with 30 and 25  
2 amplification cycles. PCR products were purified (PCR Purification Kit, Analytic Jena, Jena,  
3 Germany), sequenced (AGOWA GmbH, Berlin, Germany) and sequence similarities were  
4 determined as described above.

5 **Agar shake technique.** Agar shake media contained (per liter) 1.0 g NaCl, 0.4 g of  
6  $\text{MgCl}_2 \cdot 6\text{H}_2\text{O}$ , 0.1 g of  $\text{CaCl}_2 \cdot \text{H}_2\text{O}$ , 0.5 g KCl, 0.3 g of  $\text{NH}_4\text{Cl}$  and 0.6 g of  $\text{KH}_2\text{PO}_4$ , 20 mM  
7  $\text{Fe}(\text{OH})_3$ , 50 mM HEPES, 100  $\mu\text{M}$  AQDS, 0.5 mM  $\text{FeCl}_2$ , 0.5% agar (AppliChem), 1 ml  
8 vitamin solution M141 (3), 1 ml trace element solution SL9 (3), and 1 mM each lactate and  
9 ethanol. Agar shake cultures were incubated at 22°C in the dark for 3 weeks. Distinct black  
10 colonies were observed only for the cultures tolerant to 0.1 mM Cd or Cu. Colonies were  
11 picked using sterile, anaerobic technique and transferred to fresh agar shakes. After 5  
12 subsequent transfers in agar shake media, colonies were transferred to the liquid media  
13 described above without agar and with 0.1% yeast extract and 30 mM bicarbonate as a buffer.  
14 DNA was extracted from cell pellets using the PowerSoil DNA Isolation kit (Mo Bio  
15 Laboratories, Solana Beach, California) according to manufacturer's instructions and then  
16 PCR amplified with 16S rRNA gene primers fD1 and rP2 (see above). Strains were  
17 sequenced at Macrogen Inc. (Macrogen Europe, Amsterdam, Netherlands) and assembled  
18 using Geneious Pro version 4.6.4 (Biomatters, <http://www.geneious.com>). Fe(II) formation  
19 was determined as described above and carbon utilization was determined with high-  
20 performance liquid chromatography (4).

21

## 22 **References**

- 23 1. **Altschul, S. F., W. Gish, W. Miller, E. W. Myers, and D. J. Lipman.** 1990. Basic  
24 local alignment search tool. *J. Mol. Biol.* **215**:403-410.
- 25 2. **Ashelford, K. E., N. A. Chuzhanova, J. C. Fry, A. J. Jones, and A. J. Weightman.**  
26 2005. At least one in twenty 16S rRNA sequence records currently held in public

- 1 repositories estimated to contain substantial anomalies. *Appl. Environ. Microbiol.*  
2 **12:7724-7736.**
- 3 3. **Benz, M., A. Brune, and B. Schink.** 1998. Anaerobic and aerobic oxidation of  
4 ferrous iron at neutral pH by chemoheterotrophic nitrate-reducing bacteria. *Arch.*  
5 *Microbiol.* **169:159-165.**
- 6 4. **Burkhardt, E.-M., D. M. Akob, S. Bischoff, J. Sitte, J. E. Kostka, D. Banerjee, A.**  
7 **C. Scheinost, and K. Küsel.** 2010. Impact of biostimulated redox processes on metal  
8 dynamics in an iron-rich creek soil of a former uranium mining area. *Environ. Sci.*  
9 *Technol.* **44:177-183.**
- 10 5. **Cole, J. R., B. Chai, T. L. Marsh, R. J. Farris, Q. Wang, S. A. Kulam, S. Chandra,**  
11 **D. M. McGarrell, T. M. Schmidt, G. M. Garrity, and J. M. Tiedje.** 2003. The  
12 Ribosomal Database Project (RDP-II): previewing a new autoaligner that allows  
13 regular updates and the new prokaryotic taxonomy. *Nucleic Acids Research*  
14 **31(1):442-443.**
- 15 6. **Good, I. J.** 1953. The population frequencies of species and the estimation of  
16 population parameters. *Biometrika* **40:237-264.**
- 17 7. **Hall, T. A.** 1999. BioEdit: a user-friendly biological sequence alignment editor and  
18 analysis program for Windows 95/98/NT. *Nucleic Acids Symp. Ser.* **41:95-98.**
- 19 8. **Huber, T., G. Faulkner, and P. Hugenholtz.** 2004. Bellerophon, a program to detect  
20 chimeric sequences in multiple sequence alignments, *Bioinformatics* **20: 2317-2319**
- 21 9. **Kozdrój, J., and J. D. van Elsas.** 2000. Response of the bacterial community to root  
22 exudates in soil polluted with heavy metals assessed by molecular and cultural  
23 approaches. *Soil Biol. Biochem.* **32:1405-1417.**
- 24 10. **Küsel, K., U. Roth, and H. L. Drake.** 2002. Microbial reduction of Fe(III) in the  
25 presence of oxygen under low pH conditions. *Environ. Microbiol.* **4:414-421.**

- 1 11. **Singleton, D. R., M. A. Furlong, S. L. Rathbun, and W. B. Whitman.** 2001.  
2 Quantitative comparisons of 16S rRNA gene sequence libraries from environmental  
3 samples. *Appl. Environ. Microbiol.* **67**:4374-4376.
- 4 12. **Sitte, J., D. M. Akob, C. Kaufmann, K. Finster, D. Banerjee, E.-M. Burkhardt, J.**  
5 **E. Kostka, A.C. Scheinost, G. Büchel, and K. Küsel.** 2010. Sulfate-reducing activity  
6 linked to metal retention in contaminated soil located at a former uranium-mining  
7 district (Ronneburg, Germany). *Appl. Environ. Microbiol.* **76**:3143-3152.
- 8 13. **Tamura, H., K. Goto, T. Yotsuyan, and M. Nagayama,** 1974. Spectrophotometric  
9 determination of iron(II) with 1,10-phenanthroline in presence of large amounts of  
10 iron(III). *Talanta* **21**:314-318.
- 11 14. **Weisburg, W. G., S. M. Barns, D. A. Pelletier, and D. J. Lane.** 1991. 16S  
12 ribosomal DNA amplification for phylogenetic study. *J. Bacteriol.* **173**:697-703.
- 13 15. **Yu, Y., M. Breitbart, P. McNairnie, and F. Rohwer.** 2006. FastGroupII: A web-  
14 based bioinformatics platform for analyses of large 16S rDNA libraries, *BMC*  
15 *Bioinformatics* **7**:57.

1 Figure S1: Fe(II) and average metal concentrations of the pore water in the soil profile at the  
 2 bank of the contaminated creek Gessenbach as measured monthly in 2007. The corresponding  
 3 soil horizons are given at the right side of the graphs. This figure includes Fe(II)  
 4 concentrations from August which have been published previously (4).  
 5

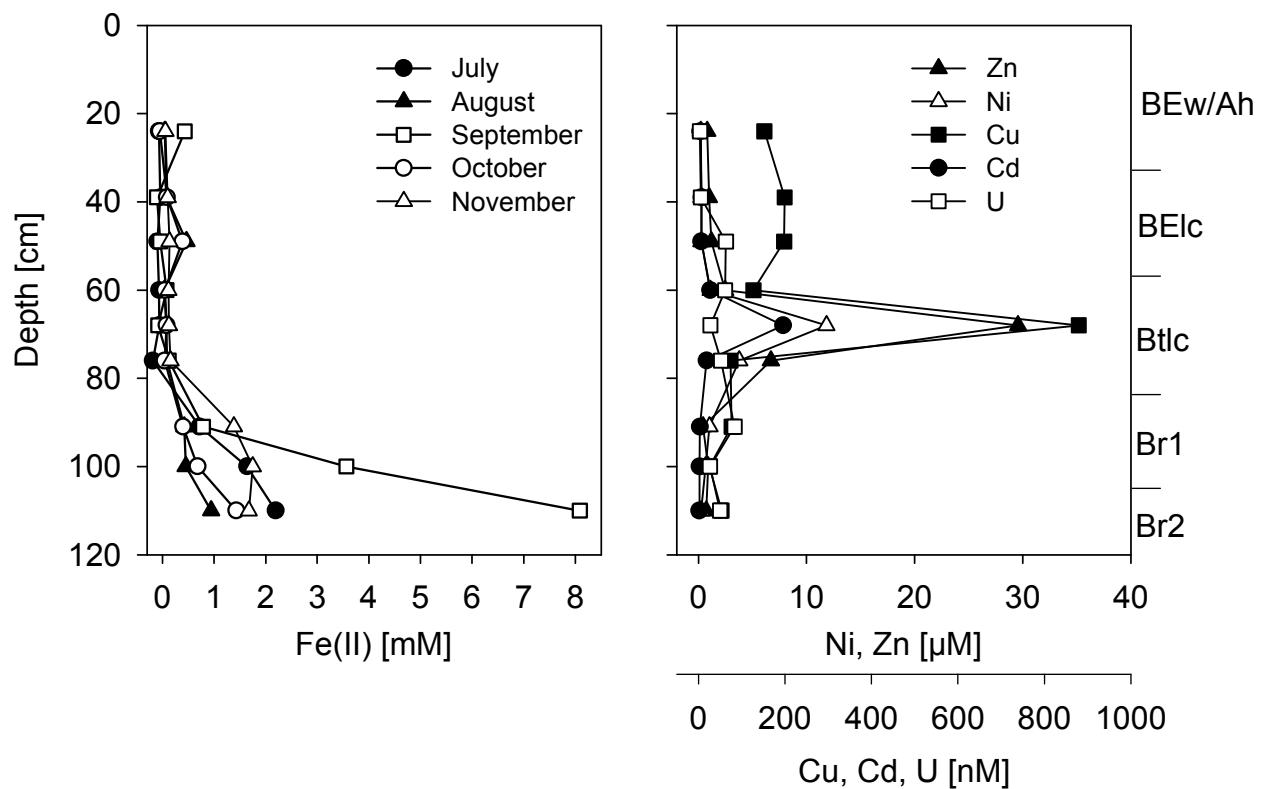

1 Table S1: Summary of phylogenetic affiliation and distribution of SSU rRNA gene clones from clone libraries of metal amended enrichment  
 2 cultures.

| Phylogenetic group         | Clone designation | Nearest relative (accession number)                    | % Identity | Number of clones per phylotype |
|----------------------------|-------------------|--------------------------------------------------------|------------|--------------------------------|
| <i>Betaproteobacteria</i>  | SB60              | <i>Dechloromonas</i> sp. MissR (AF170357)              | 99         | 1                              |
| <i>Deltaproteobacteria</i> | SB3               | Clone IRD18B06 (AY947909)                              | 97         | 8                              |
|                            | SB8               | <i>Geobacter psychrophilus</i> (AY653549)              | 98         | 21                             |
|                            | SB54              | <i>Geobacter</i> sp. Ply1 (EF527233)                   | 98         | 2                              |
| <i>Firmicutes</i>          | SB4               | <i>Anaerobranca</i> sp. Clone SRB2 (DQ069229)          | 96         | 3                              |
|                            | SB5               | <i>Sedimentibacter</i> sp. Clone JN18_A14_H (DQ168650) | 99         | 2                              |
|                            | SB18              | <i>Sedimentibacter</i> sp. Clone BRS2 (AY221992)       | 98         | 4                              |
|                            | SB25              | Clone BSV34 (AJ229194)                                 | 97         | 2                              |
|                            | SB52              | <i>Clostridiaceae</i> clone dgC-140 (AB218342)         | 92         | 1                              |
|                            | SB15              | Clone ZZ14C3 (AY214191)                                | 98         | 1                              |

3

4
